# Supplementary material for: Detection of Vasodilators From Herbal Components by a Transcriptome-Based Functional Gene Module Reference Approach
Source: PubMed Central journal article supplement (PMC6783510; doi:10.3389/fphar.2019.01144), 2019-10-02
Supplement: DataSheet_1.pdf [file DataSheet_1.pdf]

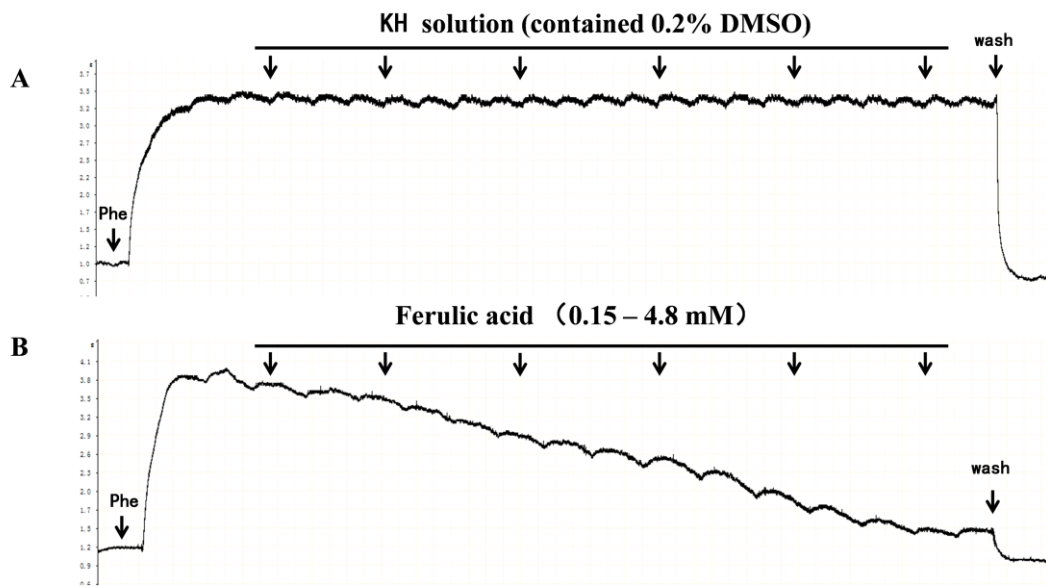

**Supplementary figure 1** Representative original recordings of KH solution (contained 0.2% DMSO) or herbal component-induced relaxation (Take ferulic acid for example) on vascular rings precontracted with Phe.
