# Supplementary material for: Detection of Vasodilators From Herbal Components by a Transcriptome-Based Functional Gene Module Reference Approach
Source: Front Pharmacol. 2019 Oct 2;10:1144. doi: 10.3389/fphar.2019.01144 (PMC6783510; doi:10.3389/fphar.2019.01144)
Supplement: Supplementary file 1 [file Table_1.xlsx]

## Sheet: PFGM
Supplementary table 1. functional gene modules that positively regulate blood vessel diameter
Gene symbol	Gene member of GO:0097755-positive regulation of blood vessel diameter	Coexpression Score	P-Value
ADCYAP1	√
EPHX2	√
GCH1	√
GJA5	√
KNG1	√
UCN	√
CASR	√
ADRB3	√
ADRB2	√
KCNMB1	√
ADRB1	√
KCNMA1	√
SCPEP1	√
DOCK5	√
INS	√
F2RL1	√
PLA2G6	√
NOS3	√
SOD1	√
SOD2	√
NOS1	√
APOE	√
ALOX12	√
MTNR1B	√
ARHGAP42	√
MKKS	√
LEP	√
BBS2	√
DRD1	√
PLOD3	√
PRKG1	√
APLN	√
ADORA1	√
ADORA2A	√
EDNRB	√
ADM	√
CPS1	√
ADORA2B	√
EGFR	√
GPX1	√
PTPRM	√
BDKRB2	√
ATG5	√
NPPC	√
BMPR2	√
ITGA1	√
DOCK4	√
CALCA	√
PPARD	√
PTAFR	√
RGS2	√
HMOX1	√
AGT	√
VIP	√
AGTR2	√
MMP19	ⅹ	0.2716	0
GPR4	ⅹ	0.2636	0.0001
LBP	ⅹ	0.197	0.0005
ROBO4	ⅹ	0.2502	0.0007
ARHGEF15	ⅹ	0.2471	0.0008
PDGFB	ⅹ	0.2225	0.0009
STARD8	ⅹ	0.2124	0.0009
ACVRL1	ⅹ	0.2392	0.001
ACSM5	ⅹ	0.2196	0.001
CD209	ⅹ	0.2445	0.0011
FCN3	ⅹ	0.192	0.0011
FAM107A	ⅹ	0.2384	0.0012
LYVE1	ⅹ	0.2156	0.0012
C1QTNF1	ⅹ	0.2288	0.0013
PLA2G5	ⅹ	0.2277	0.0013
CLDN11	ⅹ	0.189	0.0017
NRP2	ⅹ	0.2327	0.0018
CSF3	ⅹ	0.2223	0.0018
MYBPH	ⅹ	0.2013	0.0019
PCDH12	ⅹ	0.2181	0.002
43712	ⅹ	0.2137	0.002
LILRB5	ⅹ	0.1964	0.002
BDKRB1	ⅹ	0.1928	0.0021
SLCO2B1	ⅹ	0.2246	0.0024
MYCT1	ⅹ	0.2106	0.0024
CXORF36	ⅹ	0.2605	0.0027
BEST1	ⅹ	0.2444	0.0027
APLNR	ⅹ	0.2202	0.0029
DYSF	ⅹ	0.2136	0.0029
SCN1B	ⅹ	0.1935	0.0029
LILRB3	ⅹ	0.2671	0.003
ALOX15B	ⅹ	0.2086	0.0034
KCNJ15	ⅹ	0.1957	0.0034
NLRP3	ⅹ	0.2158	0.0037
SOD3	ⅹ	0.2313	0.0042
HYAL1	ⅹ	0.1868	0.0042
SIGLEC7	ⅹ	0.2512	0.0043
CCL11	ⅹ	0.1958	0.0043
FOLR2	ⅹ	0.2371	0.0044
ANGPTL4	ⅹ	0.2043	0.0044
PAPPA	ⅹ	0.2094	0.0045
LRRC32	ⅹ	0.2237	0.0046
EBF2	ⅹ	0.182	0.005
MASP1	ⅹ	0.2314	0.0051
BCL6B	ⅹ	0.2154	0.0052
XPNPEP2	ⅹ	0.2075	0.0053
HS3ST2	ⅹ	0.1879	0.0053
SLC11A1	ⅹ	0.2414	0.0054
FNDC4	ⅹ	0.2196	0.0054
NRG1	ⅹ	0.1929	0.0054
GJA4	ⅹ	0.1898	0.0054
HSD11B1	ⅹ	0.1784	0.0054
PDE2A	ⅹ	0.1941	0.0055
CSF1	ⅹ	0.235	0.0056
FPR1	ⅹ	0.2218	0.0056
HSPB7	ⅹ	0.2046	0.0056
SOX17	ⅹ	0.1883	0.0056
ADRA1A	ⅹ	0.2317	0.0058
RASL12	ⅹ	0.1931	0.0058
HAS1	ⅹ	0.1879	0.0058
HEYL	ⅹ	0.2146	0.006
SIGLEC9	ⅹ	0.2203	0.0061
JPH2	ⅹ	0.2176	0.0062
MSR1	ⅹ	0.2009	0.0063
SLCO2A1	ⅹ	0.1895	0.0064
NPR1	ⅹ	0.2152	0.0065
HSPB6	ⅹ	0.2216	0.0066
LAMA4	ⅹ	0.2154	0.0066
CLEC14A	ⅹ	0.2143	0.0066
NOTCH4	ⅹ	0.192	0.0066
KCNJ10	ⅹ	0.1832	0.0068
HIGD1B	ⅹ	0.1728	0.0069
SOCS3	ⅹ	0.2118	0.007
TEK	ⅹ	0.2189	0.0071
CLEC1A	ⅹ	0.2154	0.0071
SVEP1	ⅹ	0.2373	0.0074
WISP1	ⅹ	0.2167	0.0074
GALNTL2	ⅹ	0.1983	0.0075
C12ORF39	ⅹ	0.1848	0.0076
TACR1	ⅹ	0.2194	0.0077
COL5A3	ⅹ	0.2112	0.0077
GFRA2	ⅹ	0.2091	0.0077
TREM1	ⅹ	0.2064	0.0077
STAB2	ⅹ	0.2061	0.0078
ADAMTS2	ⅹ	0.2319	0.0079
PDE1B	ⅹ	0.2018	0.0082
MARCO	ⅹ	0.1876	0.0082
CCL13	ⅹ	0.1845	0.0082
SLC6A12	ⅹ	0.183	0.0085
ADH1A	ⅹ	0.1827	0.0085
ADCY4	ⅹ	0.2097	0.0086
MYO7A	ⅹ	0.201	0.0086
SNAI1	ⅹ	0.1796	0.0086
CIDEC	ⅹ	0.168	0.0087
DPYS	ⅹ	0.1573	0.0088
RAB3IL1	ⅹ	0.2251	0.0089
ECSCR	ⅹ	0.1901	0.0089
GPR116	ⅹ	0.1873	0.0089
BTNL3	ⅹ	0.2016	0.009
FGF1	ⅹ	0.1958	0.009
SDS	ⅹ	0.1649	0.009
PRELP	ⅹ	0.2326	0.0091
C8B	ⅹ	0.1826	0.0092
GPD1	ⅹ	0.2002	0.0093
CMKLR1	ⅹ	0.2094	0.0094
SLIT3	ⅹ	0.2082	0.0094
DLL4	ⅹ	0.1881	0.0095
C13ORF33	ⅹ	0.1988	0.0097
MPZ	ⅹ	0.1825	0.0098
KCNJ5	ⅹ	0.2372	0.0099
AQP9	ⅹ	0.1976	0.01
CIDEA	ⅹ	0.1618	0.01
