# Supplementary material for: Detection of Vasodilators From Herbal Components by a Transcriptome-Based Functional Gene Module Reference Approach
Source: Front Pharmacol. 2019 Oct 2;10:1144. doi: 10.3389/fphar.2019.01144 (PMC6783510; doi:10.3389/fphar.2019.01144)
Supplement: Supplementary file 2 [file Table_2.xlsx]

## Sheet: NFGM
Supplementary table 2. functional gene modules that negatively regulate blood vessel diameter
Gene symbol	Gene member of GO:0097756-negative regulation of blood vessel diameter	Coexpression Score	P-Value
KCNMB2	√
GJA5	√
WDR35	√
F2R	√
OXTR	√
RAP1GDS1	√
COMP	√
CASR	√
P2RX1	√
ADRA2C	√
ADRA2A	√
ADRA2B	√
RHOA	√
FGB	√
ASIC2	√
HMGCR	√
INS	√
DBH	√
SLC8A1	√
PTGS2	√
KEL	√
ATP1A2	√
AKT1	√
EDN1	√
HTR1D	√
EDNRA	√
EDN3	√
HTR1B	√
ARHGAP42	√
MKKS	√
TRPM4	√
LEP	√
BBS2	√
DRD5	√
APLN	√
ADORA1	√
EDNRB	√
PER2	√
KCNA5	√
ACTA2	√
ADM	√
ECE1	√
EGFR	√
FGG	√
HTR7	√
SMTNL1	√
HTR2A	√
HTR2B	√
CHRM3	√
BDKRB2	√
AVPR1A	√
PIK3C2A	√
AVPR1B	√
AVP	√
BMPR2	√
HRH2	√
ACE2	√
ADRA1B	√
ADRA1A	√
KCNMB4	√
CRP	√
CHGA	√
DOCK4	√
CAV1	√
CD38	√
FGA	√
PTAFR	√
AGT	√
ACE	√
SLC6A4	√
TBXA2R	√
HRH1	√
CXORF36	ⅹ	0.4053	0
GPR4	ⅹ	0.3746	0.0004
STAB2	ⅹ	0.341	0.0011
SCTR	ⅹ	0.3136	0.0021
KCNJ5	ⅹ	0.3763	0.0027
ROBO4	ⅹ	0.3561	0.0027
HTR4	ⅹ	0.3944	0.0033
ARHGEF15	ⅹ	0.3582	0.0034
CD209	ⅹ	0.3572	0.0034
HEYL	ⅹ	0.3417	0.0037
JPH2	ⅹ	0.3467	0.0038
GLP1R	ⅹ	0.4034	0.0041
NXPH3	ⅹ	0.3647	0.0043
C3ORF36	ⅹ	0.2903	0.0043
CAMK2A	ⅹ	0.3623	0.0049
NPR1	ⅹ	0.3383	0.0049
MASP1	ⅹ	0.3538	0.0055
TACR1	ⅹ	0.344	0.0056
XPNPEP2	ⅹ	0.3204	0.0057
REM1	ⅹ	0.3157	0.0057
LDB3	ⅹ	0.3395	0.0058
EBF2	ⅹ	0.2815	0.006
AVPR2	ⅹ	0.3436	0.0061
HTR5A	ⅹ	0.3054	0.0064
MYBPC3	ⅹ	0.3566	0.0068
ADRB3	ⅹ	0.3545	0.0068
AMHR2	ⅹ	0.3377	0.0069
HSPB7	ⅹ	0.3142	0.0069
PCDH12	ⅹ	0.3131	0.0069
SCN2B	ⅹ	0.3385	0.0071
FGF23	ⅹ	0.3109	0.0072
C22ORF26	ⅹ	0.3158	0.0073
TBX5	ⅹ	0.3181	0.0074
FOXL1	ⅹ	0.295	0.0074
HNF4A	ⅹ	0.3736	0.0077
CHRD	ⅹ	0.3365	0.0077
SVEP1	ⅹ	0.3606	0.0078
HPSE2	ⅹ	0.3168	0.0079
INSRR	ⅹ	0.2939	0.0081
PADI1	ⅹ	0.3544	0.0083
BMP8A	ⅹ	0.3134	0.0085
FCN3	ⅹ	0.2703	0.0085
CAV3	ⅹ	0.3152	0.0086
BCL6B	ⅹ	0.3237	0.009
C8A	ⅹ	0.2931	0.009
NTRK3	ⅹ	0.3746	0.0094
RAB3IL1	ⅹ	0.3473	0.0095
RHO	ⅹ	0.3682	0.0098
LZTS1	ⅹ	0.3392	0.01
VIPR2	ⅹ	0.3292	0.01
