# Supplementary material for: Detection of Vasodilators From Herbal Components by a Transcriptome-Based Functional Gene Module Reference Approach
Source: Front Pharmacol. 2019 Oct 2;10:1144. doi: 10.3389/fphar.2019.01144 (PMC6783510; doi:10.3389/fphar.2019.01144)
Supplement: Supplementary file 3 [file Table_3.xlsx]

## Sheet: Sheet2
Supplementary table 3.The 102 herbal compounds ordered by the TES values
Herbal compound	ESPFGM	ESNFGM	TES	p-value
Ferulic acid	0.18613	-0.23296	0.41909	0
Borneol	0.20319	-0.19229	0.39548	0
Liquiritin	0.20125	-0.19294	0.39419	0
Magnolol	0.18829	-0.20207	0.39036	0
Ginsenoside Rc	0.17223	-0.21126	0.38349	0
Artemisinin	0.17073	-0.21156	0.38229	0
Chenodeoxycholic acid	0.20224	-0.17739	0.37963	0
Daidzin	0.1892	-0.17029	0.35949	0
Bacopaside I	0.17394	-0.16953	0.34347	0
Ginsenoside Rb2	0.19064	-0.14889	0.33953	0
Andrographolide	0.27088	0.18315	0.08773	0.49
Hydroxysafflor yellow A	-0.19913	-0.27915	0.08002	0.514
Sennoside A	0.29974	0.22039	0.07935	0.547
Paeoniflorin	0.2483	0.17024	0.07806	0.513
Ginsenoside Rb1	-0.2136	-0.2905	0.0769	0.491
Santonin	-0.21293	-0.28509	0.07216	0.538
Resibufogenin	-0.18911	-0.26003	0.07092	0.515
Bruceine D	-0.12002	-0.18675	0.06673	0.558
Tanshinone IIA	0.21007	0.14547	0.0646	0.521
Strychnine	0.30306	0.24335	0.05971	0.532
Chlorogenic acid	-0.19073	-0.24309	0.05236	0.553
Astragaloside IV	-0.20279	-0.25386	0.05107	0.58
Chelerythrine	0.22497	0.18198	0.04299	0.623
Sanguinarine	-0.18953	-0.23252	0.04299	0.564
Deoxycholic acid	-0.15728	-0.19975	0.04247	0.556
Ainsliadimer A	-0.17454	-0.21574	0.0412	0.587
Scutellarein	-0.2378	-0.27545	0.03765	0.621
Japonicone A	0.17152	0.13429	0.03723	0.624
Gamabufatalin	-0.17339	-0.20302	0.02963	0.694
Tetrahydropalmatine	-0.17536	-0.20227	0.02691	0.703
Isoborneol	-0.17299	-0.19932	0.02633	0.697
Glycyrrhizic acid	-0.17875	-0.20401	0.02526	0.685
Hesperidin	-0.18177	-0.20687	0.0251	0.702
Gastrodin	-0.22418	-0.24838	0.0242	0.729
Cinnamaldehyde	-0.17849	-0.2012	0.02271	0.739
Berberine hydrochloride	-0.15262	-0.17324	0.02062	0.739
Resveratrol	-0.18095	-0.20137	0.02042	0.767
Ursodeoxycholic acid	-0.16165	-0.18193	0.02028	0.759
Benzoylhypaconitine	-0.18319	-0.20218	0.01899	0.769
Ephedrine hydrochloride	0.20456	0.18585	0.01871	0.78
Cinobufotalin	0.23175	0.21358	0.01817	0.779
Osthole	-0.18956	-0.20672	0.01716	0.798
Saikosaponin D	-0.2154	-0.23221	0.01681	0.801
Benzoylaconitine	-0.17891	-0.19559	0.01668	0.801
Gentiopicroside	-0.20511	-0.22158	0.01647	0.788
Oleanic acid	-0.22927	-0.24433	0.01506	0.798
Hypaconitine	0.22372	0.21133	0.01239	0.842
β-ecdysterone	-0.20429	-0.21593	0.01164	0.876
Ginsenoside Rg1	-0.23266	-0.2408	0.00814	0.897
Curculigoside	0.23052	0.22298	0.00754	0.893
Oridonin	0.21309	0.21567	-0.00258	0.974
Cinnamic acid	0.15549	0.15848	-0.00299	0.955
Hyperoside	-0.16875	-0.16481	-0.00394	0.939
Geniposide	-0.18457	-0.18001	-0.00456	0.947
Nitidine chloride	0.14032	0.14762	-0.0073	0.909
Cinobufogenin	-0.20014	-0.19205	-0.00809	0.901
Saikosaponin A	-0.23684	-0.22755	-0.00929	0.885
Ginkgolide B	-0.20366	-0.1937	-0.00996	0.862
Oxymatrine	0.19615	0.20936	-0.01321	0.86
Isoalantolactone	0.18949	0.20348	-0.01399	0.815
6 gingerol	0.20772	0.22211	-0.01439	0.83
Salvianic acid A sodium	-0.19449	-0.17943	-0.01506	0.802
Narciclasine	-0.09838	-0.078193	-0.020187	0.775
Imperatorin	-0.19316	-0.1699	-0.02326	0.744
Gallic acid	-0.24945	-0.2173	-0.03215	0.669
L-scopolamine	-0.24085	-0.20749	-0.03336	0.656
Anhydroicaritin	-0.26219	-0.22865	-0.03354	0.645
Silybin	0.18538	0.22051	-0.03513	0.629
Stachydrine.hydrochloride	-0.25785	-0.22	-0.03785	0.615
Notoginsenoside R1	-0.22562	-0.18698	-0.03864	0.618
Benzyl benzoate	-0.23574	-0.19707	-0.03867	0.636
Telocinobufagin	0.22077	0.26234	-0.04157	0.593
Lobetyolin	-0.21462	-0.16875	-0.04587	0.589
(+)-2-(1-hydroxyl-4-oxocyclohexyl)ethyl caffeate	-0.20894	-0.16233	-0.04661	0.572
Hyodeoxycholic acid	-0.23717	-0.19023	-0.04694	0.565
Acteoside	-0.24824	-0.20119	-0.04705	0.586
Bufalin	0.19491	0.24201	-0.0471	0.585
Aconitine	-0.25778	-0.21	-0.04778	0.575
Four mixture	0.15096	0.20059	-0.04963	0.552
Ginsenoside Rd	-0.19386	-0.14163	-0.05223	0.569
Emodin	-0.22957	-0.17474	-0.05483	0.543
Salidroside	-0.22586	-0.17025	-0.05561	0.532
Matrine	0.14403	0.20299	-0.05896	0.561
Salvianolic acid B	-0.30066	-0.24169	-0.05897	0.525
Cholic acid	0.14554	0.20546	-0.05992	0.525
1β hydroxyalantolactone	-0.2008	-0.12663	-0.07417	0.522
Bufotaline	-0.24442	-0.15481	-0.08961	0.482
Alantolactone	-0.24875	-0.15728	-0.09147	0.506
Britanin	-0.13353	0.15659	-0.29012	0
Muscone	-0.16197	0.13477	-0.29674	0
Protocatechuic aldehyde	-0.15209	0.16491	-0.317	0
Ginsenoside Re	-0.16561	0.18527	-0.35088	0
Schizandrin	-0.19159	0.17718	-0.36877	0
Phillyrin	-0.19787	0.17309	-0.37096	0
Ginsenoside Rb3	-0.15548	0.22089	-0.37637	0
Puerarin	-0.19265	0.18384	-0.37649	0
Honokiol	-0.19586	0.19296	-0.38882	0
Macrozamin	-0.1953	0.20139	-0.39669	0
Dioscin	-0.1714	0.22788	-0.39928	0
Bilobalide	-0.18668	0.21541	-0.40209	0
Arenobufagin	-0.23347	0.16986	-0.40333	0
Schisantherin A	-0.20481	0.22262	-0.42743	0
