# Supplementary material for: Detection of Vasodilators From Herbal Components by a Transcriptome-Based Functional Gene Module Reference Approach
Source: Front Pharmacol. 2019 Oct 2;10:1144. doi: 10.3389/fphar.2019.01144 (PMC6783510; doi:10.3389/fphar.2019.01144)
Supplement: Supplementary file 4 [file Table_4.xlsx]

## Sheet: Artemisinin
Supplementary table 4. the regulated genes in PFGM and NFGM for ferulic acid, borneol, daidzin, magnolol, chenodeoxycholic acid and artemisinin
Genes in PFGM	Genes in NFGM
CASR	AKT1
NLRP3	HTR1D
SLIT3	CD209
MYCT1	KCNMB2
APLNR	ECE1
LAMA4	PCDH12
DOCK4	BDKRB2
MSR1	BMP8A
ACVRL1	AVP
WISP1	TRPM4
VIP	DBH
KNG1	ADRA2B
CALCA	INS
SIGLEC7	INSRR
STARD8	ADRA2A
MASP1	ADRA1B
ALOX15B	TACR1
ITGA1	SLC6A4
COL5A3	NPR1
PAPPA	HTR2A
ALOX12	GPR4
PDE2A	FOXL1
ARHGEF15	RHO
FPR1	KCNJ5
GJA4	HSPB7
AGTR2	CRP
HEYL	ASIC2
SOX17	KEL
LILRB5	HTR5A
ROBO4	HTR2B
PLA2G5	STAB2
SLC6A12	KCNA5
CIDEA	PTGS2
EGFR	ACE2
PRKG1	EBF2
GFRA2	EDNRB
KCNJ15	LZTS1
SOCS3	ADRA1A
RASL12	MYBPC3
FCN3	SVEP1
BDKRB1	AVPR1A
ADRB1	HPSE2
FNDC4	COMP
MPZ
HSD11B1
SCPEP1
BTNL3
MYO7A
ADRB3
NOS1
ADORA1
BMPR2
MTNR1B
LILRB3
UCN
APOE
NOTCH4
DPYS
CPS1

## Sheet: Borneol
Genes in PFGM	Genes in NFGM
SLCO2B1	OXTR
PDGFB	ADRA2A
ITGA1	AVP
VIP	DRD5
SOX17	KCNA5
INS	SCN2B
WISP1	HTR2B
LAMA4	GPR4
HAS1	COMP
SIGLEC7	AKT1
SLC6A12	HTR2A
PLA2G5	HRH1
FGF1	EBF2
ADRB3	SLC6A4
ROBO4	BMP8A
BMPR2	PTGS2
NRP2	NXPH3
ADAMTS2	HTR4
ARHGEF15	XPNPEP2
CCL11	PCDH12
HSD11B1	AMHR2
HSPB6	PTAFR
C1QTNF1	ASIC2
NLRP3	TBX5
ACVRL1	STAB2
DOCK5	LDB3
RASL12	KCNJ5
CSF3	CHRD
NOS3	FOXL1
PRKG1	HSPB7
FAM107A	RHO
PTPRM	ADORA1
HS3ST2	CASR
LYVE1	LEP
CD209	EDNRB
HYAL1	CD38
NPR1	HTR5A
MARCO	CHRM3
COL5A3	ECE1
DPYS	TACR1
ADM	PADI1
EGFR	AVPR2
SVEP1	HTR7
BDKRB2	LZTS1
MPZ	DBH
CMKLR1	SLC8A1
ADRA1A	KEL
PRELP	CAV3
FOLR2	MYBPC3
KCNMB1
STARD8
SOCS3
BTNL3
ADRB1
AGT
MASP1
NOS1
GPD1
RAB3IL1

## Sheet: Chenodeoxycholic acid
Genes in PFGM	Genes in NFGM
EBF2	PTGS2
NLRP3	FGG
WISP1	ROBO4
SLIT3	FCN3
ADRA1A	AKT1
SOX17	CD209
PLA2G5	LEP
MPZ	TRPM4
C1QTNF1	EDN3
PRKG1	VIPR2
KCNJ5	HEYL
ALOX15B	CD38
MTNR1B	SCTR
HYAL1	SVEP1
SLC6A12	DBH
VIP	GJA5
BDKRB1	RHO
SLC11A1	INS
CLEC1A	ADORA1
ADRB3	AMHR2
NRP2	KEL
PRELP	COMP
KCNMA1	STAB2
BMPR2	FGF23
SOD3	KCNA5
FNDC4	HTR5A
CLDN11	ECE1
FAM107A	BMP8A
SIGLEC7	CAMK2A
ARHGEF15	XPNPEP2
C8B	SCN2B
KNG1	CHRD
ADM	SLC8A1
MYBPH	MYBPC3
EGFR	HTR7
CASR	CHRM3
FGF1	ACTA2
CSF1	TACR1
EDNRB	CAV3
HS3ST2	TBX5
PDE2A	GPR4
NOS1	HTR2B
COL5A3	NTRK3
GJA4	HPSE2
KCNMB1
MASP1
RAB3IL1
LILRB3
ADRB2
ACSM5
NPR1
CMKLR1
PAPPA
DPYS
FOLR2
F2RL1
FPR1
KCNJ15
HSPB6

## Sheet: Daidzin
Genes in PFGM	Genes in NFGM
NLRP3	AVPR1B
VIP	SVEP1
NPPC	BMPR2
KCNMA1	ADORA1
WISP1	HTR2A
CASR	CD209
HAS1	OXTR
ADRA1A	EDN1
PRKG1	HTR5A
SOX17	PTAFR
EBF2	ARHGEF15
SLIT3	DOCK4
SIGLEC7	FGB
ITGA1	ADRB3
LILRB5	CAV3
CLEC1A	HTR1D
RGS2	CAV1
HEYL	ROBO4
LILRB3	P2RX1
SLC11A1	HTR4
DOCK5	ACE2
ADAMTS2	MYBPC3
EGFR	KCNA5
GPR4	ADM
COL5A3	CHRD
KCNJ5	XPNPEP2
MPZ	ASIC2
CSF1	FGA
HSD11B1	LEP
NOS3	HNF4A
HS3ST2	SLC6A4
LYVE1	LZTS1
KNG1	C8A
PLA2G5	ATP1A2
APOE	HTR2B
MASP1	AVPR1A
MMP19	ADRA1B
TACR1	PTGS2
ADRB1	COMP
GPD1
STARD8
LBP
BDKRB2
RASL12
C8B
DPYS
GJA4
CIDEA
GJA5
CIDEC

## Sheet: Ferulic acid
Genes in PFGM	Genes in NFGM
ITGA1	AMHR2
SIGLEC7	ADRA1B
LBP	AKT1
APOE	BMPR2
LAMA4	AVPR1B
ADRB3	MKKS
MASP1	PADI1
FGF1	HTR1D
ARHGEF15	FGF23
TACR1	GJA5
DOCK4	PCDH12
VIP	PTAFR
NOS3	HTR2A
RASL12	GPR4
LYVE1	INS
PLA2G5	HRH2
LILRB3	DBH
CLDN11	KCNA5
SLCO2B1	CHRM3
CCL11	HNF4A
GJA4	KCNMB2
HAS1	NPR1
RAB3IL1	LDB3
NRP2	LEP
ALOX15B	SLC6A4
SLIT3	AVPR1A
WISP1	CD209
FNDC4	KCNJ5
ADRA1A	HTR2B
CIDEA	CHRD
EGFR	XPNPEP2
MYCT1	EDN3
CSF3	KEL
HSPB6	ADRA2A
GPD1	CASR
MSR1	HTR7
COL5A3	SCN2B
RGS2	CD38
ADM	EBF2
MARCO	FGB
TEK	MYBPC3
SOX17	PER2
EDNRB	BMP8A
SLCO2A1	CAV3
KNG1	P2RX1
ACSM5	ATP1A2
MPZ	C8A
STARD8	PTGS2
SCPEP1	ADRA2B
FPR1	COMP
EPHX2	SVEP1
PLA2G6	HPSE2
C1QTNF1
DPYS
F2RL1
KCNMB1
SLC11A1
HS3ST2
CALCA
ALOX12
BTNL3
JPH2
HEYL
ADCYAP1
AGT
FCN3
SCN1B

## Sheet: Magnolol
Genes in PFGM	Genes in NFGM
VIP	PER2
NLRP3	ACE
SIGLEC7	GLP1R
AGTR2	SLC8A1
PLA2G5	MASP1
MASP1	FGB
SOX17	HTR4
NRG1	HRH1
HYAL1	LZTS1
ITGA1	NTRK3
CASR	CASR
CLEC1A	EDN3
PDGFB	CD209
PDE2A	KCNA5
ADCYAP1	KCNJ5
CD209	HTR1D
KCNJ5	CHGA
ADRB3	SCN2B
NPPC	ADRB3
HSD11B1	CAMK2A
LAMA4	INS
CLDN11	EBF2
HSPB6	HEYL
INS	CRP
GJA4	TBX5
EBF2	ADRA2B
HEYL	FGG
HIGD1B	TACR1
PDE1B	XPNPEP2
KCNMB1	ADRA1B
RGS2	HRH2
LILRB3	TRPM4
TACR1	ROBO4
XPNPEP2	P2RX1
ACSM5	DRD5
BEST1	F2R
HS3ST2	AKT1
LYVE1	HNF4A
ADRB1	HTR5A
ROBO4	PADI1
LRRC32	HTR1B
MMP19	EDNRB
PAPPA	ACE2
WISP1	ARHGEF15
KCNMA1
ACVRL1
NOS1
HMOX1
GPX1
CIDEA
SLCO2B1
SOD3
NOS3
DOCK5
CCL13
EDNRB
ARHGEF15
ALOX12
