# Supplementary material for: Detection of Vasodilators From Herbal Components by a Transcriptome-Based Functional Gene Module Reference Approach
Source: Front Pharmacol. 2019 Oct 2;10:1144. doi: 10.3389/fphar.2019.01144 (PMC6783510; doi:10.3389/fphar.2019.01144)
Supplement: Supplementary file 5 [file Table_5.xlsx]

## Sheet: supplementary table 5 pvalue_ol
Supplementary table 5. overlapping analysis for between the regulated genes of ferulic acid, borneol, daidzin, magnolol, chenodeoxycholic acid and artemisinin
	Ferulic.acid	Borneol	Daidzin	Magnolol	Chenodeoxycholic.acid	Artemisinin
Ferulic.acid	4.84e-139	4.68e-34	4.82e-25	1.08e-10	2.32e-29	3.73e-27
Borneol	4.68e-34	7.32e-104	2.98e-19	4.8e-10	1.69e-30	4.82e-25
Daidzin	4.82e-25	2.98e-19	3.41e-62	8.17e-09	9.1e-13	1.68e-17
Magnolol	1.08e-10	4.8e-10	8.17e-09	3.41e-62	4.8e-10	3.13e-08
Chenodeoxycholic.acid	2.32e-29	1.69e-30	9.1e-13	4.8e-10	5.34e-91	4.78e-22
Artemisinin	3.73e-27	4.82e-25	1.68e-17	3.13e-08	4.78e-22	1.26e-88
