# Supplementary material for: Detection of Vasodilators From Herbal Components by a Transcriptome-Based Functional Gene Module Reference Approach
Source: Front Pharmacol. 2019 Oct 2;10:1144. doi: 10.3389/fphar.2019.01144 (PMC6783510; doi:10.3389/fphar.2019.01144)
Supplement: Supplementary file 6 [file Table_6.xlsx]

## Sheet: Sheet1
Supplementary table 6. Functional analysis of the regulated genes of ferulic acid, borneol, daidzin, magnolol, chenodeoxycholic acid and artemisinin in GSEA website.
Gene Set Name	Genes in Gene Set (K)	Description	Genes in Overlap (k)	k/K	p-value	FDR q-value	Herb compound	Genes in PFGM/NFGM
GO_POSITIVE_REGULATION_OF_BLOOD_VESSEL_DIAMETER	59	Any process that increases the diameter of blood vessels. [GOC:pr]	19	0.322	4.07e-42	4.15e-38	Magnolol	PFGM
GO_VASCULAR_PROCESS_IN_CIRCULATORY_SYSTEM	167	A circulatory process that occurs at the level of the vasculature. [GOC:mtg_cardio]	20	0.1198	8.14e-35	4.15e-31	Magnolol	PFGM
GO_REGULATION_OF_TUBE_SIZE	141	Ensuring that a tube is of the correct length and diameter. Tube size must be maintained not only during tube formation, but also throughout development and in some physiological processes. [PMID:10887083]	19	0.1348	4.31e-34	1.46e-30	Magnolol	PFGM
GO_CIRCULATORY_SYSTEM_PROCESS	548	A organ system process carried out by any of the organs or tissues of the circulatory system. The circulatory system is an organ system that moves extracellular fluids to and from tissue within a multicellular organism. [GOC:mtg_cardio]	23	0.042	2.16e-29	5.49e-26	Magnolol	PFGM
GO_VASODILATION	33	An increase in the internal diameter of blood vessels, especially arterioles or capillaries, due to relaxation of smooth muscle cells that line the vessels, and usually resulting in a decrease in blood pressure. [GOC:pr, ISBN:0192800981]	11	0.3333	8.93e-25	1.82e-21	Magnolol	PFGM
GO_REGULATION_OF_ANATOMICAL_STRUCTURE_SIZE	501	Any process that modulates the size of an anatomical structure. [GOC:dph, GOC:tb]	19	0.0379	2.35e-23	3.99e-20	Magnolol	PFGM
GO_NEGATIVE_REGULATION_OF_MULTICELLULAR_ORGANISMAL_PROCESS	1288	Any process that stops, prevents, or reduces the frequency, rate or extent of an organismal process, the processes pertinent to the function of an organism above the cellular level; includes the integrated processes of tissues and organs. [GOC:ai]	22	0.0171	1.27e-19	1.84e-16	Magnolol	PFGM
GO_POSITIVE_REGULATION_OF_MULTICELLULAR_ORGANISMAL_PROCESS	1795	Any process that activates or increases the frequency, rate or extent of an organismal process, any of the processes pertinent to the function of an organism above the cellular level; includes the integrated processes of tissues and organs. [GOC:ai]	24	0.0134	4.88e-19	6.21e-16	Magnolol	PFGM
GO_REGULATION_OF_SYSTEM_PROCESS	610	Any process that modulates the frequency, rate or extent of a system process, a multicellular organismal process carried out by any of the organs or tissues in an organ system. [GOC:jl]	15	0.0246	1.04e-15	1.17e-12	Magnolol	PFGM
GO_RESPONSE_TO_OXYGEN_CONTAINING_COMPOUND	1616	Any process that results in a change in state or activity of a cell or an organism (in terms of movement, secretion, enzyme production, gene expression, etc.) as a result of an oxygen-containing compound stimulus. [GOC:pr, GOC:TermGenie]	20	0.0124	3.84e-15	3.91e-12	Magnolol	PFGM
GO_NEGATIVE_REGULATION_OF_BLOOD_VESSEL_DIAMETER	81	Any process that decreases the diameter of blood vessels. [GOC:pr]	24	0.2963	3.14e-56	3.2e-52	Magnolol	NFGM
GO_REGULATION_OF_TUBE_SIZE	141	Ensuring that a tube is of the correct length and diameter. Tube size must be maintained not only during tube formation, but also throughout development and in some physiological processes. [PMID:10887083]	25	0.1773	2.09e-52	1.07e-48	Magnolol	NFGM
GO_VASCULAR_PROCESS_IN_CIRCULATORY_SYSTEM	167	A circulatory process that occurs at the level of the vasculature. [GOC:mtg_cardio]	25	0.1497	2.07e-50	7.01e-47	Magnolol	NFGM
GO_CIRCULATORY_SYSTEM_PROCESS	548	A organ system process carried out by any of the organs or tissues of the circulatory system. The circulatory system is an organ system that moves extracellular fluids to and from tissue within a multicellular organism. [GOC:mtg_cardio]	28	0.0511	2.41e-43	6.14e-40	Magnolol	NFGM
GO_REGULATION_OF_ANATOMICAL_STRUCTURE_SIZE	501	Any process that modulates the size of an anatomical structure. [GOC:dph, GOC:tb]	26	0.0519	4.22e-40	8.6e-37	Magnolol	NFGM
GO_REGULATION_OF_VASOCONSTRICTION	56	Any process that modulates the frequency, rate or extent of reductions in the diameter of blood vessels. [GOC:jl]	16	0.2857	8.99e-37	1.53e-33	Magnolol	NFGM
GO_REGULATION_OF_BLOOD_CIRCULATION	299	Any process that modulates the frequency, rate or extent of blood circulation. [GO_REF:0000058, GOC:mr, GOC:TermGenie, PMID:10659969]	21	0.0702	1.04e-34	1.51e-31	Magnolol	NFGM
GO_REGULATION_OF_SYSTEM_PROCESS	610	Any process that modulates the frequency, rate or extent of a system process, a multicellular organismal process carried out by any of the organs or tissues in an organ system. [GOC:jl]	23	0.0377	6.92e-32	8.81e-29	Magnolol	NFGM
GO_CELL_CELL_SIGNALING	1644	Any process that mediates the transfer of information from one cell to another. This process includes signal transduction in the receiving cell and, where applicable, release of a ligand and any processes that actively facilitate its transport and presentation to the receiving cell. Examples include signaling via soluble ligands, via cell adhesion molecules and via gap junctions. [GOC:dos, GOC:ma…	28	0.017	6.06e-30	6.86e-27	Magnolol	NFGM
GO_POSITIVE_REGULATION_OF_BLOOD_CIRCULATION	71	Any process that activates or increases the frequency, rate or extent of blood circulation. [GO_REF:0000058, GOC:mr, GOC:TermGenie, PMID:10659969]	12	0.169	1.41e-24	1.43e-21	Magnolol	NFGM
GO_POSITIVE_REGULATION_OF_BLOOD_VESSEL_DIAMETER	59	Any process that increases the diameter of blood vessels. [GOC:pr]	20	0.339	1.05e-44	1.07e-40	Artemisinin	PFGM
GO_VASCULAR_PROCESS_IN_CIRCULATORY_SYSTEM	167	A circulatory process that occurs at the level of the vasculature. [GOC:mtg_cardio]	21	0.1257	7.33e-37	3.73e-33	Artemisinin	PFGM
GO_REGULATION_OF_TUBE_SIZE	141	Ensuring that a tube is of the correct length and diameter. Tube size must be maintained not only during tube formation, but also throughout development and in some physiological processes. [PMID:10887083]	20	0.1418	3.38e-36	1.15e-32	Artemisinin	PFGM
GO_CIRCULATORY_SYSTEM_PROCESS	548	A organ system process carried out by any of the organs or tissues of the circulatory system. The circulatory system is an organ system that moves extracellular fluids to and from tissue within a multicellular organism. [GOC:mtg_cardio]	23	0.042	3.5e-29	8.91e-26	Artemisinin	PFGM
GO_VASODILATION	33	An increase in the internal diameter of blood vessels, especially arterioles or capillaries, due to relaxation of smooth muscle cells that line the vessels, and usually resulting in a decrease in blood pressure. [GOC:pr, ISBN:0192800981]	12	0.3636	2.11e-27	4.29e-24	Artemisinin	PFGM
GO_REGULATION_OF_ANATOMICAL_STRUCTURE_SIZE	501	Any process that modulates the size of an anatomical structure. [GOC:dph, GOC:tb]	20	0.0399	7.27e-25	1.23e-21	Artemisinin	PFGM
GO_NEGATIVE_REGULATION_OF_BLOOD_PRESSURE	47	Any process in which the force of blood traveling through the circulatory system is decreased. [GOC:go_curators, GOC:mtg_cardio]	10	0.2128	2.71e-20	3.95e-17	Artemisinin	PFGM
GO_NEGATIVE_REGULATION_OF_MULTICELLULAR_ORGANISMAL_PROCESS	1288	Any process that stops, prevents, or reduces the frequency, rate or extent of an organismal process, the processes pertinent to the function of an organism above the cellular level; includes the integrated processes of tissues and organs. [GOC:ai]	20	0.0155	7.66e-17	9.75e-14	Artemisinin	PFGM
GO_SECOND_MESSENGER_MEDIATED_SIGNALING	442	Any intracellular signal transduction in which the signal is passed on within the cell via a second messenger; a small molecule or ion that can be quickly generated or released from intracellular stores, and can diffuse within the cell. Second-messenger signaling includes production or release of the second messenger, and effectors downstream of the second messenger that further transmit the sign…	14	0.0317	4.23e-16	4.79e-13	Artemisinin	PFGM
GO_REGULATION_OF_BLOOD_PRESSURE	179	Any process that modulates the force with which blood travels through the circulatory system. The process is controlled by a balance of processes that increase pressure and decrease pressure. [GOC:dph, GOC:mtg_cardio, ISBN:0721643949]	11	0.0615	5.46e-16	5.56e-13	Artemisinin	PFGM
GO_NEGATIVE_REGULATION_OF_BLOOD_VESSEL_DIAMETER	81	Any process that decreases the diameter of blood vessels. [GOC:pr]	25	0.3086	1.35e-59	1.38e-55	Artemisinin	NFGM
GO_REGULATION_OF_TUBE_SIZE	141	Ensuring that a tube is of the correct length and diameter. Tube size must be maintained not only during tube formation, but also throughout development and in some physiological processes. [PMID:10887083]	26	0.1844	1.59e-55	8.09e-52	Artemisinin	NFGM
GO_VASCULAR_PROCESS_IN_CIRCULATORY_SYSTEM	167	A circulatory process that occurs at the level of the vasculature. [GOC:mtg_cardio]	26	0.1557	1.92e-53	6.52e-50	Artemisinin	NFGM
GO_CIRCULATORY_SYSTEM_PROCESS	548	A organ system process carried out by any of the organs or tissues of the circulatory system. The circulatory system is an organ system that moves extracellular fluids to and from tissue within a multicellular organism. [GOC:mtg_cardio]	29	0.0529	5.25e-46	1.34e-42	Artemisinin	NFGM
GO_REGULATION_OF_ANATOMICAL_STRUCTURE_SIZE	501	Any process that modulates the size of an anatomical structure. [GOC:dph, GOC:tb]	26	0.0519	1.75e-40	3.55e-37	Artemisinin	NFGM
GO_REGULATION_OF_VASOCONSTRICTION	56	Any process that modulates the frequency, rate or extent of reductions in the diameter of blood vessels. [GOC:jl]	17	0.3036	7.93e-40	1.35e-36	Artemisinin	NFGM
GO_REGULATION_OF_BLOOD_CIRCULATION	299	Any process that modulates the frequency, rate or extent of blood circulation. [GO_REF:0000058, GOC:mr, GOC:TermGenie, PMID:10659969]	20	0.0669	8.14e-33	1.18e-29	Artemisinin	NFGM
GO_REGULATION_OF_SYSTEM_PROCESS	610	Any process that modulates the frequency, rate or extent of a system process, a multicellular organismal process carried out by any of the organs or tissues in an organ system. [GOC:jl]	23	0.0377	3.34e-32	4.26e-29	Artemisinin	NFGM
GO_MUSCLE_CONTRACTION	360	A process in which force is generated within muscle tissue, resulting in a change in muscle geometry. Force generation involves a chemo-mechanical energy conversion step that is carried out by the actin/myosin complex activity, which generates force through ATP hydrolysis. [GOC:ef, GOC:mtg_muscle, ISBN:0198506732]	17	0.0472	3.77e-25	4.27e-22	Artemisinin	NFGM
GO_MUSCLE_SYSTEM_PROCESS	473	A organ system process carried out at the level of a muscle. Muscle tissue is composed of contractile cells or fibers. [GOC:mtg_cardio]	17	0.0359	4.04e-23	4.11e-20	Artemisinin	NFGM
GO_POSITIVE_REGULATION_OF_BLOOD_VESSEL_DIAMETER	59	Any process that increases the diameter of blood vessels. [GOC:pr]	20	0.339	2.16e-43	2.2e-39	Ferulic acid	PFGM
GO_VASCULAR_PROCESS_IN_CIRCULATORY_SYSTEM	167	A circulatory process that occurs at the level of the vasculature. [GOC:mtg_cardio]	22	0.1317	1.19e-37	6.07e-34	Ferulic acid	PFGM
GO_REGULATION_OF_TUBE_SIZE	141	Ensuring that a tube is of the correct length and diameter. Tube size must be maintained not only during tube formation, but also throughout development and in some physiological processes. [PMID:10887083]	21	0.1489	4.06e-37	1.38e-33	Ferulic acid	PFGM
GO_REGULATION_OF_ANATOMICAL_STRUCTURE_SIZE	501	Any process that modulates the size of an anatomical structure. [GOC:dph, GOC:tb]	23	0.0459	1.5e-28	3.81e-25	Ferulic acid	PFGM
GO_CIRCULATORY_SYSTEM_PROCESS	548	A organ system process carried out by any of the organs or tissues of the circulatory system. The circulatory system is an organ system that moves extracellular fluids to and from tissue within a multicellular organism. [GOC:mtg_cardio]	23	0.042	1.18e-27	2.4e-24	Ferulic acid	PFGM
GO_DIVALENT_INORGANIC_CATION_HOMEOSTASIS	509	Any process involved in the maintenance of an internal steady state of divalent cations within an organism or cell. [GOC:mah]	18	0.0354	2.65e-20	4.5e-17	Ferulic acid	PFGM
GO_POSITIVE_REGULATION_OF_MULTICELLULAR_ORGANISMAL_PROCESS	1795	Any process that activates or increases the frequency, rate or extent of an organismal process, any of the processes pertinent to the function of an organism above the cellular level; includes the integrated processes of tissues and organs. [GOC:ai]	26	0.0145	1.17e-19	1.7e-16	Ferulic acid	PFGM
GO_ION_HOMEOSTASIS	813	Any process involved in the maintenance of an internal steady state of ions within an organism or cell. [GOC:ai]	20	0.0246	1.9e-19	2.42e-16	Ferulic acid	PFGM
GO_NEGATIVE_REGULATION_OF_MULTICELLULAR_ORGANISMAL_PROCESS	1288	Any process that stops, prevents, or reduces the frequency, rate or extent of an organismal process, the processes pertinent to the function of an organism above the cellular level; includes the integrated processes of tissues and organs. [GOC:ai]	23	0.0179	2.66e-19	3.01e-16	Ferulic acid	PFGM
GO_VASODILATION	33	An increase in the internal diameter of blood vessels, especially arterioles or capillaries, due to relaxation of smooth muscle cells that line the vessels, and usually resulting in a decrease in blood pressure. [GOC:pr, ISBN:0192800981]	9	0.2727	6.37e-19	6.49e-16	Ferulic acid	PFGM
GO_NEGATIVE_REGULATION_OF_BLOOD_VESSEL_DIAMETER	81	Any process that decreases the diameter of blood vessels. [GOC:pr]	32	0.3951	7.59e-78	7.73e-74	Ferulic acid	NFGM
GO_REGULATION_OF_TUBE_SIZE	141	Ensuring that a tube is of the correct length and diameter. Tube size must be maintained not only during tube formation, but also throughout development and in some physiological processes. [PMID:10887083]	33	0.234	1.47e-71	7.49e-68	Ferulic acid	NFGM
GO_VASCULAR_PROCESS_IN_CIRCULATORY_SYSTEM	167	A circulatory process that occurs at the level of the vasculature. [GOC:mtg_cardio]	33	0.1976	7.67e-69	2.6e-65	Ferulic acid	NFGM
GO_CIRCULATORY_SYSTEM_PROCESS	548	A organ system process carried out by any of the organs or tissues of the circulatory system. The circulatory system is an organ system that moves extracellular fluids to and from tissue within a multicellular organism. [GOC:mtg_cardio]	37	0.0675	7.5e-60	1.91e-56	Ferulic acid	NFGM
GO_REGULATION_OF_VASOCONSTRICTION	56	Any process that modulates the frequency, rate or extent of reductions in the diameter of blood vessels. [GOC:jl]	24	0.4286	1.44e-58	2.94e-55	Ferulic acid	NFGM
GO_REGULATION_OF_ANATOMICAL_STRUCTURE_SIZE	501	Any process that modulates the size of an anatomical structure. [GOC:dph, GOC:tb]	34	0.0679	2.16e-54	3.67e-51	Ferulic acid	NFGM
GO_REGULATION_OF_BLOOD_CIRCULATION	299	Any process that modulates the frequency, rate or extent of blood circulation. [GO_REF:0000058, GOC:mr, GOC:TermGenie, PMID:10659969]	28	0.0936	6.03e-48	8.77e-45	Ferulic acid	NFGM
GO_REGULATION_OF_SYSTEM_PROCESS	610	Any process that modulates the frequency, rate or extent of a system process, a multicellular organismal process carried out by any of the organs or tissues in an organ system. [GOC:jl]	29	0.0475	5.03e-41	6.4e-38	Ferulic acid	NFGM
GO_POSITIVE_REGULATION_OF_VASOCONSTRICTION	31	Any process that activates or increases the frequency, rate or extent of vasoconstriction. [GOC:go_curators]	14	0.4516	2.16e-34	2.44e-31	Ferulic acid	NFGM
GO_MUSCLE_CONTRACTION	360	A process in which force is generated within muscle tissue, resulting in a change in muscle geometry. Force generation involves a chemo-mechanical energy conversion step that is carried out by the actin/myosin complex activity, which generates force through ATP hydrolysis. [GOC:ef, GOC:mtg_muscle, ISBN:0198506732]	22	0.0611	5.31e-33	5.41e-30	Ferulic acid	NFGM
GO_POSITIVE_REGULATION_OF_BLOOD_VESSEL_DIAMETER	59	Any process that increases the diameter of blood vessels. [GOC:pr]	15	0.2542	1.32e-32	1.35e-28	Daidzin	PFGM
GO_REGULATION_OF_TUBE_SIZE	141	Ensuring that a tube is of the correct length and diameter. Tube size must be maintained not only during tube formation, but also throughout development and in some physiological processes. [PMID:10887083]	16	0.1135	1.15e-28	5.87e-25	Daidzin	PFGM
GO_VASCULAR_PROCESS_IN_CIRCULATORY_SYSTEM	167	A circulatory process that occurs at the level of the vasculature. [GOC:mtg_cardio]	16	0.0958	1.96e-27	6.64e-24	Daidzin	PFGM
GO_VASODILATION	33	An increase in the internal diameter of blood vessels, especially arterioles or capillaries, due to relaxation of smooth muscle cells that line the vessels, and usually resulting in a decrease in blood pressure. [GOC:pr, ISBN:0192800981]	10	0.303	8.07e-23	2.05e-19	Daidzin	PFGM
GO_CIRCULATORY_SYSTEM_PROCESS	548	A organ system process carried out by any of the organs or tissues of the circulatory system. The circulatory system is an organ system that moves extracellular fluids to and from tissue within a multicellular organism. [GOC:mtg_cardio]	17	0.031	1.07e-20	2.17e-17	Daidzin	PFGM
GO_REGULATION_OF_ANATOMICAL_STRUCTURE_SIZE	501	Any process that modulates the size of an anatomical structure. [GOC:dph, GOC:tb]	16	0.0319	1.1e-19	1.86e-16	Daidzin	PFGM
GO_NEGATIVE_REGULATION_OF_MULTICELLULAR_ORGANISMAL_PROCESS	1288	Any process that stops, prevents, or reduces the frequency, rate or extent of an organismal process, the processes pertinent to the function of an organism above the cellular level; includes the integrated processes of tissues and organs. [GOC:ai]	19	0.0148	3.74e-17	5.44e-14	Daidzin	PFGM
GO_REGULATION_OF_SYSTEM_PROCESS	610	Any process that modulates the frequency, rate or extent of a system process, a multicellular organismal process carried out by any of the organs or tissues in an organ system. [GOC:jl]	15	0.0246	8.65e-17	1.1e-13	Daidzin	PFGM
GO_INTRINSIC_COMPONENT_OF_PLASMA_MEMBRANE	1708	The component of the plasma membrane consisting of the gene products and protein complexes having either part of their peptide sequence embedded in the hydrophobic region of the membrane or some other covalently attached group such as a GPI anchor that is similarly embedded in the membrane. [GOC:dos, GOC:mah]	20	0.0117	3.68e-16	4.16e-13	Daidzin	PFGM
GO_REGULATION_OF_BLOOD_CIRCULATION	299	Any process that modulates the frequency, rate or extent of blood circulation. [GO_REF:0000058, GOC:mr, GOC:TermGenie, PMID:10659969]	11	0.0368	2.19e-14	2.23e-11	Daidzin	PFGM
GO_NEGATIVE_REGULATION_OF_BLOOD_VESSEL_DIAMETER	81	Any process that decreases the diameter of blood vessels. [GOC:pr]	25	0.3086	3.37e-61	3.43e-57	Daidzin	NFGM
GO_REGULATION_OF_TUBE_SIZE	141	Ensuring that a tube is of the correct length and diameter. Tube size must be maintained not only during tube formation, but also throughout development and in some physiological processes. [PMID:10887083]	26	0.1844	3.09e-57	1.57e-53	Daidzin	NFGM
GO_VASCULAR_PROCESS_IN_CIRCULATORY_SYSTEM	167	A circulatory process that occurs at the level of the vasculature. [GOC:mtg_cardio]	26	0.1557	3.75e-55	1.27e-51	Daidzin	NFGM
GO_REGULATION_OF_VASOCONSTRICTION	56	Any process that modulates the frequency, rate or extent of reductions in the diameter of blood vessels. [GOC:jl]	20	0.3571	7.39e-50	1.88e-46	Daidzin	NFGM
GO_CIRCULATORY_SYSTEM_PROCESS	548	A organ system process carried out by any of the organs or tissues of the circulatory system. The circulatory system is an organ system that moves extracellular fluids to and from tissue within a multicellular organism. [GOC:mtg_cardio]	28	0.0511	1.03e-45	2.09e-42	Daidzin	NFGM
GO_REGULATION_OF_ANATOMICAL_STRUCTURE_SIZE	501	Any process that modulates the size of an anatomical structure. [GOC:dph, GOC:tb]	27	0.0539	1.76e-44	2.99e-41	Daidzin	NFGM
GO_REGULATION_OF_BLOOD_CIRCULATION	299	Any process that modulates the frequency, rate or extent of blood circulation. [GO_REF:0000058, GOC:mr, GOC:TermGenie, PMID:10659969]	22	0.0736	1.65e-38	2.4e-35	Daidzin	NFGM
GO_REGULATION_OF_SYSTEM_PROCESS	610	Any process that modulates the frequency, rate or extent of a system process, a multicellular organismal process carried out by any of the organs or tissues in an organ system. [GOC:jl]	23	0.0377	1.38e-33	1.76e-30	Daidzin	NFGM
GO_REGULATION_OF_BLOOD_PRESSURE	179	Any process that modulates the force with which blood travels through the circulatory system. The process is controlled by a balance of processes that increase pressure and decrease pressure. [GOC:dph, GOC:mtg_cardio, ISBN:0721643949]	16	0.0894	4.93e-29	5.57e-26	Daidzin	NFGM
GO_MUSCLE_CONTRACTION	360	A process in which force is generated within muscle tissue, resulting in a change in muscle geometry. Force generation involves a chemo-mechanical energy conversion step that is carried out by the actin/myosin complex activity, which generates force through ATP hydrolysis. [GOC:ef, GOC:mtg_muscle, ISBN:0198506732]	18	0.05	4.32e-28	4.4e-25	Daidzin	NFGM
GO_POSITIVE_REGULATION_OF_BLOOD_VESSEL_DIAMETER	59	Any process that increases the diameter of blood vessels. [GOC:pr]	15	0.2542	2.33e-31	2.37e-27	Chenodeoxycholic acid	PFGM
GO_VASCULAR_PROCESS_IN_CIRCULATORY_SYSTEM	167	A circulatory process that occurs at the level of the vasculature. [GOC:mtg_cardio]	18	0.1078	2.7e-30	1.38e-26	Chenodeoxycholic acid	PFGM
GO_REGULATION_OF_TUBE_SIZE	141	Ensuring that a tube is of the correct length and diameter. Tube size must be maintained not only during tube formation, but also throughout development and in some physiological processes. [PMID:10887083]	17	0.1206	1.73e-29	5.88e-26	Chenodeoxycholic acid	PFGM
GO_CIRCULATORY_SYSTEM_PROCESS	548	A organ system process carried out by any of the organs or tissues of the circulatory system. The circulatory system is an organ system that moves extracellular fluids to and from tissue within a multicellular organism. [GOC:mtg_cardio]	20	0.0365	4.35e-24	1.11e-20	Chenodeoxycholic acid	PFGM
GO_INTRINSIC_COMPONENT_OF_PLASMA_MEMBRANE	1708	The component of the plasma membrane consisting of the gene products and protein complexes having either part of their peptide sequence embedded in the hydrophobic region of the membrane or some other covalently attached group such as a GPI anchor that is similarly embedded in the membrane. [GOC:dos, GOC:mah]	26	0.0152	6.72e-22	1.37e-18	Chenodeoxycholic acid	PFGM
GO_POSITIVE_REGULATION_OF_MULTICELLULAR_ORGANISMAL_PROCESS	1795	Any process that activates or increases the frequency, rate or extent of an organismal process, any of the processes pertinent to the function of an organism above the cellular level; includes the integrated processes of tissues and organs. [GOC:ai]	25	0.0139	4.44e-20	7.25e-17	Chenodeoxycholic acid	PFGM
GO_REGULATION_OF_SYSTEM_PROCESS	610	Any process that modulates the frequency, rate or extent of a system process, a multicellular organismal process carried out by any of the organs or tissues in an organ system. [GOC:jl]	18	0.0295	4.99e-20	7.25e-17	Chenodeoxycholic acid	PFGM
GO_REGULATION_OF_ANATOMICAL_STRUCTURE_SIZE	501	Any process that modulates the size of an anatomical structure. [GOC:dph, GOC:tb]	17	0.0339	6.03e-20	7.68e-17	Chenodeoxycholic acid	PFGM
GO_VASODILATION	33	An increase in the internal diameter of blood vessels, especially arterioles or capillaries, due to relaxation of smooth muscle cells that line the vessels, and usually resulting in a decrease in blood pressure. [GOC:pr, ISBN:0192800981]	8	0.2424	6.09e-17	6.89e-14	Chenodeoxycholic acid	PFGM
GO_METAL_ION_HOMEOSTASIS	656	Any process involved in the maintenance of an internal steady state of metal ions within an organism or cell. [GOC:ai, GOC:jid, GOC:mah]	16	0.0244	1.54e-16	1.57e-13	Chenodeoxycholic acid	PFGM
GO_NEGATIVE_REGULATION_OF_BLOOD_VESSEL_DIAMETER	81	Any process that decreases the diameter of blood vessels. [GOC:pr]	20	0.2469	1.11e-44	1.13e-40	Chenodeoxycholic acid	NFGM
GO_REGULATION_OF_TUBE_SIZE	141	Ensuring that a tube is of the correct length and diameter. Tube size must be maintained not only during tube formation, but also throughout development and in some physiological processes. [PMID:10887083]	20	0.1418	2.21e-39	1.13e-35	Chenodeoxycholic acid	NFGM
GO_VASCULAR_PROCESS_IN_CIRCULATORY_SYSTEM	167	A circulatory process that occurs at the level of the vasculature. [GOC:mtg_cardio]	20	0.1198	8.1e-38	2.75e-34	Chenodeoxycholic acid	NFGM
GO_CIRCULATORY_SYSTEM_PROCESS	548	A organ system process carried out by any of the organs or tissues of the circulatory system. The circulatory system is an organ system that moves extracellular fluids to and from tissue within a multicellular organism. [GOC:mtg_cardio]	23	0.042	5.76e-33	1.47e-29	Chenodeoxycholic acid	NFGM
GO_REGULATION_OF_ANATOMICAL_STRUCTURE_SIZE	501	Any process that modulates the size of an anatomical structure. [GOC:dph, GOC:tb]	22	0.0439	7.1e-32	1.45e-28	Chenodeoxycholic acid	NFGM
GO_REGULATION_OF_VASOCONSTRICTION	56	Any process that modulates the frequency, rate or extent of reductions in the diameter of blood vessels. [GOC:jl]	12	0.2143	6.19e-26	1.05e-22	Chenodeoxycholic acid	NFGM
GO_MUSCLE_CONTRACTION	360	A process in which force is generated within muscle tissue, resulting in a change in muscle geometry. Force generation involves a chemo-mechanical energy conversion step that is carried out by the actin/myosin complex activity, which generates force through ATP hydrolysis. [GOC:ef, GOC:mtg_muscle, ISBN:0198506732]	17	0.0472	6.1e-25	8.88e-22	Chenodeoxycholic acid	NFGM
GO_MUSCLE_SYSTEM_PROCESS	473	A organ system process carried out at the level of a muscle. Muscle tissue is composed of contractile cells or fibers. [GOC:mtg_cardio]	18	0.0381	9.79e-25	1.25e-21	Chenodeoxycholic acid	NFGM
GO_REGULATION_OF_BLOOD_CIRCULATION	299	Any process that modulates the frequency, rate or extent of blood circulation. [GO_REF:0000058, GOC:mr, GOC:TermGenie, PMID:10659969]	16	0.0535	2.43e-24	2.75e-21	Chenodeoxycholic acid	NFGM
GO_REGULATION_OF_SYSTEM_PROCESS	610	Any process that modulates the frequency, rate or extent of a system process, a multicellular organismal process carried out by any of the organs or tissues in an organ system. [GOC:jl]	18	0.0295	9.53e-23	9.71e-20	Chenodeoxycholic acid	NFGM
GO_POSITIVE_REGULATION_OF_BLOOD_VESSEL_DIAMETER	59	Any process that increases the diameter of blood vessels. [GOC:pr]	16	0.2712	6.14e-34	6.25e-30	Borneol	PFGM
GO_REGULATION_OF_TUBE_SIZE	141	Ensuring that a tube is of the correct length and diameter. Tube size must be maintained not only during tube formation, but also throughout development and in some physiological processes. [PMID:10887083]	18	0.1277	1.09e-31	5.57e-28	Borneol	PFGM
GO_VASCULAR_PROCESS_IN_CIRCULATORY_SYSTEM	167	A circulatory process that occurs at the level of the vasculature. [GOC:mtg_cardio]	18	0.1078	2.7e-30	9.18e-27	Borneol	PFGM
GO_REGULATION_OF_ANATOMICAL_STRUCTURE_SIZE	501	Any process that modulates the size of an anatomical structure. [GOC:dph, GOC:tb]	20	0.0399	7.27e-25	1.85e-21	Borneol	PFGM
GO_CIRCULATORY_SYSTEM_PROCESS	548	A organ system process carried out by any of the organs or tissues of the circulatory system. The circulatory system is an organ system that moves extracellular fluids to and from tissue within a multicellular organism. [GOC:mtg_cardio]	20	0.0365	4.35e-24	8.85e-21	Borneol	PFGM
GO_POSITIVE_REGULATION_OF_MULTICELLULAR_ORGANISMAL_PROCESS	1795	Any process that activates or increases the frequency, rate or extent of an organismal process, any of the processes pertinent to the function of an organism above the cellular level; includes the integrated processes of tissues and organs. [GOC:ai]	25	0.0139	4.44e-20	7.53e-17	Borneol	PFGM
GO_BIOLOGICAL_ADHESION	1417	The attachment of a cell or organism to a substrate, another cell, or other organism. Biological adhesion includes intracellular attachment between membrane regions. [GOC:isa_complete]	23	0.0162	7.41e-20	1.08e-16	Borneol	PFGM
GO_REGULATION_OF_SYSTEM_PROCESS	610	Any process that modulates the frequency, rate or extent of a system process, a multicellular organismal process carried out by any of the organs or tissues in an organ system. [GOC:jl]	16	0.0262	4.95e-17	5.95e-14	Borneol	PFGM
GO_REGULATION_OF_CELLULAR_COMPONENT_MOVEMENT	1077	Any process that modulates the frequency, rate or extent of the movement of a cellular component. [GOC:ai, GOC:dph, GOC:jl]	19	0.0176	5.26e-17	5.95e-14	Borneol	PFGM
GO_VASODILATION	33	An increase in the internal diameter of blood vessels, especially arterioles or capillaries, due to relaxation of smooth muscle cells that line the vessels, and usually resulting in a decrease in blood pressure. [GOC:pr, ISBN:0192800981]	8	0.2424	6.09e-17	6.2e-14	Borneol	PFGM
GO_NEGATIVE_REGULATION_OF_BLOOD_VESSEL_DIAMETER	81	Any process that decreases the diameter of blood vessels. [GOC:pr]	26	0.321	1.57e-60	1.6e-56	Borneol	NFGM
GO_REGULATION_OF_TUBE_SIZE	141	Ensuring that a tube is of the correct length and diameter. Tube size must be maintained not only during tube formation, but also throughout development and in some physiological processes. [PMID:10887083]	26	0.1844	2.17e-53	1.1e-49	Borneol	NFGM
GO_VASCULAR_PROCESS_IN_CIRCULATORY_SYSTEM	167	A circulatory process that occurs at the level of the vasculature. [GOC:mtg_cardio]	26	0.1557	2.61e-51	8.87e-48	Borneol	NFGM
GO_CIRCULATORY_SYSTEM_PROCESS	548	A organ system process carried out by any of the organs or tissues of the circulatory system. The circulatory system is an organ system that moves extracellular fluids to and from tissue within a multicellular organism. [GOC:mtg_cardio]	31	0.0566	9.45e-48	2.41e-44	Borneol	NFGM
GO_REGULATION_OF_ANATOMICAL_STRUCTURE_SIZE	501	Any process that modulates the size of an anatomical structure. [GOC:dph, GOC:tb]	27	0.0539	2.03e-40	4.13e-37	Borneol	NFGM
GO_REGULATION_OF_VASOCONSTRICTION	56	Any process that modulates the frequency, rate or extent of reductions in the diameter of blood vessels. [GOC:jl]	17	0.3036	1.22e-38	2.07e-35	Borneol	NFGM
GO_REGULATION_OF_BLOOD_CIRCULATION	299	Any process that modulates the frequency, rate or extent of blood circulation. [GO_REF:0000058, GOC:mr, GOC:TermGenie, PMID:10659969]	23	0.0769	1.08e-37	1.57e-34	Borneol	NFGM
GO_REGULATION_OF_SYSTEM_PROCESS	610	Any process that modulates the frequency, rate or extent of a system process, a multicellular organismal process carried out by any of the organs or tissues in an organ system. [GOC:jl]	26	0.0426	4.06e-36	5.17e-33	Borneol	NFGM
GO_POSITIVE_REGULATION_OF_VASOCONSTRICTION	31	Any process that activates or increases the frequency, rate or extent of vasoconstriction. [GOC:go_curators]	12	0.3871	6.94e-29	7.85e-26	Borneol	NFGM
GO_MUSCLE_CONTRACTION	360	A process in which force is generated within muscle tissue, resulting in a change in muscle geometry. Force generation involves a chemo-mechanical energy conversion step that is carried out by the actin/myosin complex activity, which generates force through ATP hydrolysis. [GOC:ef, GOC:mtg_muscle, ISBN:0198506732]	19	0.0528	9.12e-28	9.29e-25	Borneol	NFGM
