# Supplementary material for: Detection of Vasodilators From Herbal Components by a Transcriptome-Based Functional Gene Module Reference Approach
Source: Front Pharmacol. 2019 Oct 2;10:1144. doi: 10.3389/fphar.2019.01144 (PMC6783510; doi:10.3389/fphar.2019.01144)
Supplement: Supplementary file 7 [file Table_7.xlsx]

## Sheet: Sheet1
Supplementary table 7. Top 10 candidate vasodilators predicted by TFGMR and their vasorelaxant effects on Phe-contracted aortic rings
Herbal component	ESPFGM	ESNFGM	TES	P-value	Concentration (M)	EC50 (M)	Emax (% Phe)	Original herb
Ferulic acid	0.19	-0.23	0.42	0	1.5×10-4-4.8×10-3	8.9×10-4	87.46±2.90	"chuanxiong" (Ligusticum chuanxiong hort)
Borneol	0.2	-0.19	0.4	0	1×10-8-1×10-3	5.9×10-6	87.32±3.55	"bingpian" (Borneolum Syntheticum)
Liquiritin	0.2	-0.19	0.39	0	1.1×10-6-2.5×10-4	2.1×10-5	11.10±3.34	"gancao" (Glycyrrhizae Radix et Rhizoma)
Magnolol	0.19	-0.2	0.39	0	1.1×10-6-2.5×10-4	1.0×10-5	68.94±4.10	"houpo" (Magnolia officinalis Rehd.et Wils)
Ginsenoside Rc	0.17	-0.21	0.38	0	5×10-6-1.6×10-4	2.1×10-5	26.74±6.42	"renshen" (Ginseng Radix)
Artemisinin	0.17	-0.21	0.38	0	5×10-5-1.6×10-3	2.1×10-4	52.08±5.23	"qinghao" (Herba Artemisiae Annuae)
Chenodeoxycholic acid	0.2	-0.18	0.38	0	5×10-5-1.6×10-3	2.0×10-4	55.84±4.34	"niuhuang" (Calculus Bovis)
Daidzin	0.19	-0.17	0.36	0	5×10-5-1.6×10-3	2.2×10-4	84.67±6.56	"gegen" (Radix Puerariae)
Bacopaside I	0.17	-0.17	0.34	0	5×10-5-1.6×10-3	2.4×10-4	15.37±6.25	"machijian" (Magnolia officinalis Rehd.et Wils)
Ginsenoside Rb2	0.19	-0.15	0.34	0	2.5×10-6-8×10-5	9.8×10-6	23.27±5.88	"renshen" (Ginseng Radix)
